# Supplementary material
Source: MDPI journal article supplement (https://www.mdpi.com/2227-9717/12/1/31)
Supplement: s1 [file s1]

# Evaluation of supercapacitive properties of a PPY/PANI bilayer electrodeposited onto carbon-graphite electrodes obtained from spent batteries

Rafaela D. Oliveira, Cleverson S. Santos, Bruna M. Hryniewicz, Luís F. Marchesi, Christiana A. Pessoa

## Supplementary material

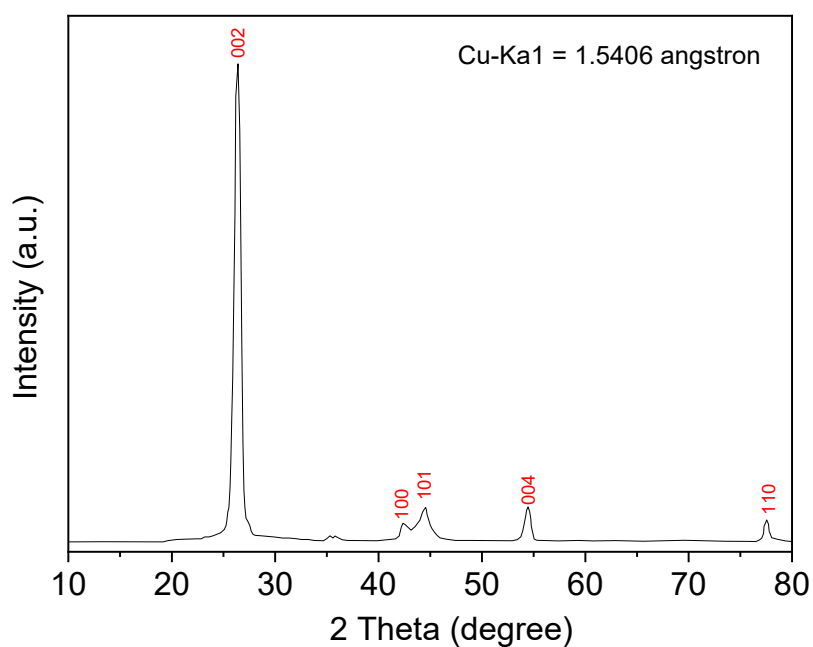

Figure S1. XRD pattern of carbon-graphite electrode.

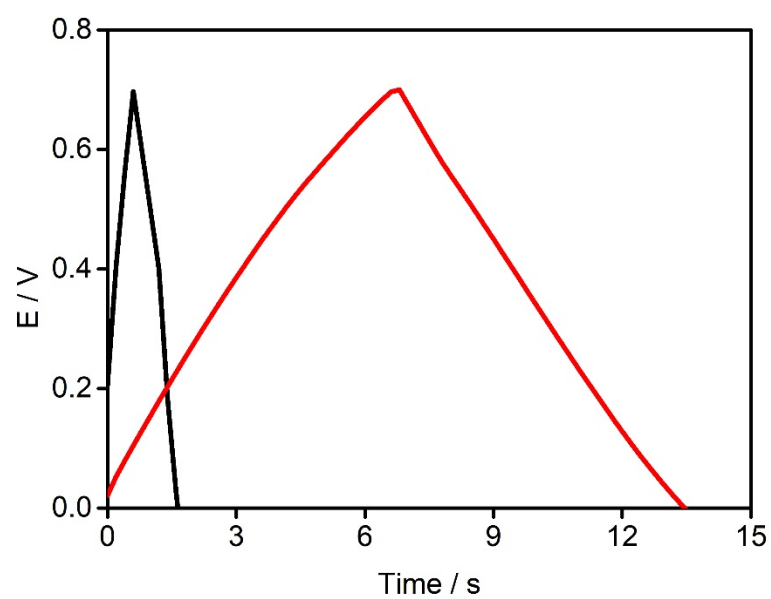

Figure S2. GCDC of a non-expanded (black line) and expanded (red line) carbon-graphite (CG) electrode. Applied current of  $1.0 \text{ mA cm}^{-2}$  and supporting electrolyte of  $\text{LiClO}_4$   $0.1 \text{ mol L}^{-1}$ .
